# Supplementary material
Source: Springer Nature journal article supplement (https://www.springermedizin.de/resource/supplementary/12245_2011_75_MOESM1_ESM.pdf/9672754)

# Overall Data

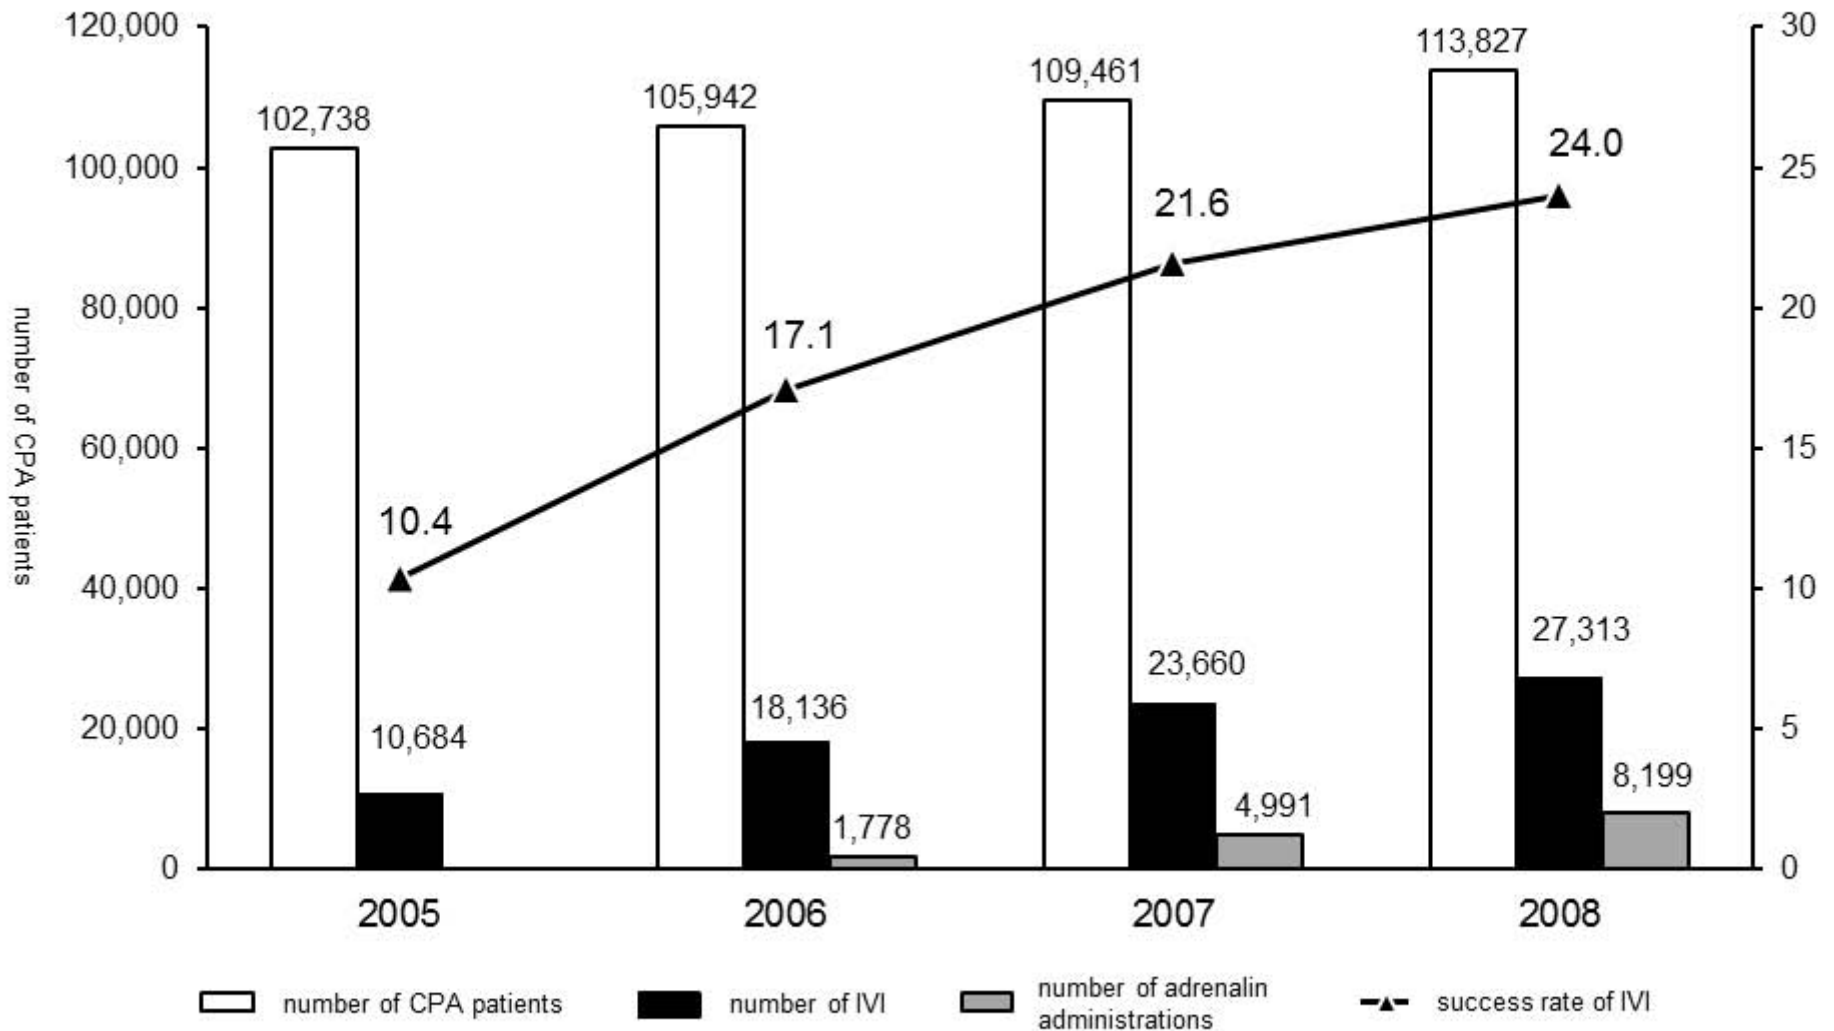

Supplement: MOESM1 [file 9672754]
